# Supplementary material for: MicroRNA-7 regulates melanocortin circuits involved in mammalian energy homeostasis
Source: PubMed Central journal article supplement (PMC9522793; doi:10.1038/s41467-022-33367-w), 2022-09-29
Supplement: 41467_2022_33367_MOESM1_ESM.pdf [file 41467_2022_33367_MOESM1_ESM.pdf]

## SUPPLEMENTARY FIGURES

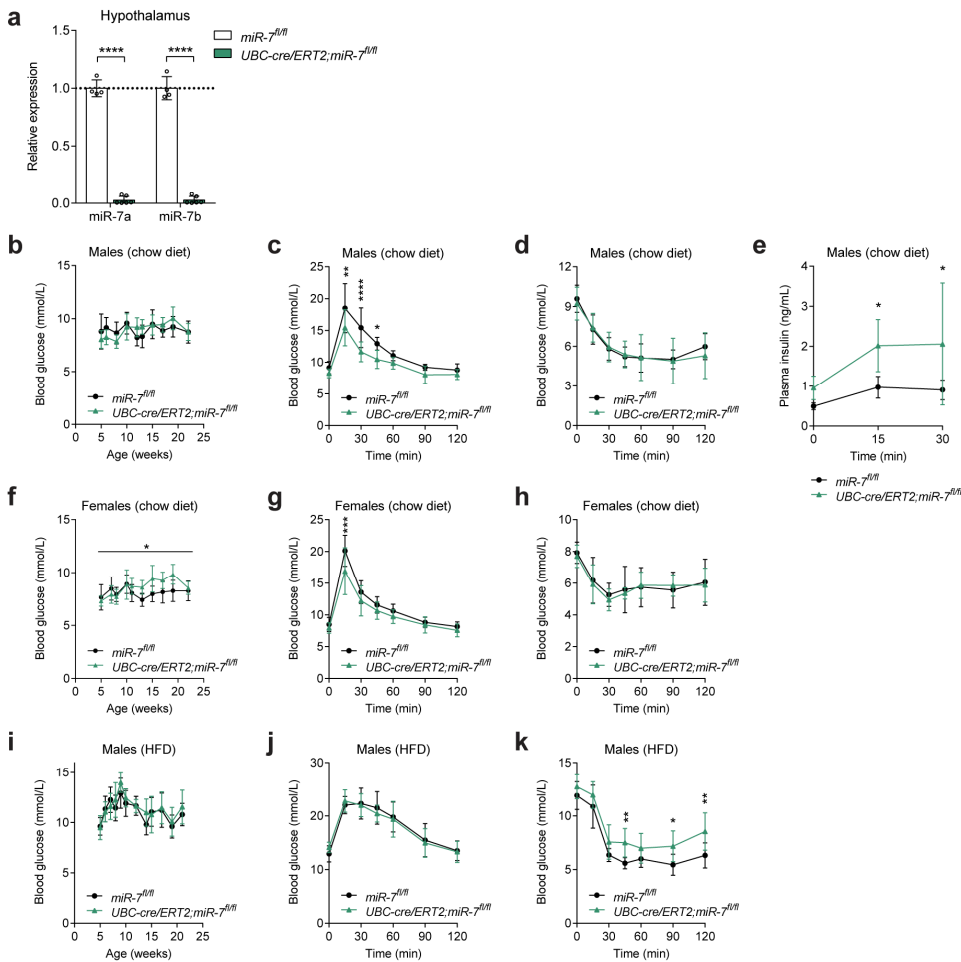Supplementary Figure 1. Metabolic phenotypes of *UBC-cre/ERT2;mir-7<sup>fl/fl</sup>* mice.

**(a)** Hypothalamic miR-7a and miR-7b expression in *mir-7<sup>fl/fl</sup>* and *UBC-cre/ERT2;mir-7<sup>fl/fl</sup>* mice (relative to *mir-7<sup>fl/fl</sup>*) (n = 4 and 6 animals).

**(b–e)** Random fed blood glucose levels (n = 8 and 10 animals) (b), blood glucose levels during an ipGTT (n = 8 and 10 animals) (c), blood glucose levels during an ipITT (n = 8 and 10 animals) (d), and plasma insulin levels during an ipGTT (n = 6 and 8 animals) (e) in chow-fed male *mir-7<sup>fl/fl</sup>* and *UBC-cre/ERT2;mir-7<sup>fl/fl</sup>* mice.

**(f–h)** Random fed blood glucose levels (n = 12 and 8 animals) (f), blood glucose levels during an ipGTT (n = 12 and 8 animals) (g), and blood glucose levels during an ipITT (n = 12 and 8 animals) (h) in chow-fed female *mir-7<sup>fl/fl</sup>* and *UBC-cre/ERT2;mir-7<sup>fl/fl</sup>* mice.

**(i–k)** Random fed blood glucose levels (n = 12 and 8 animals) (i), blood glucose levels during an ipGTT (n = 12 and 8 animals) (j), and blood glucose levels during an ipITT (n = 12 and 8 animals) (k) in HFD-fed male *mir-7<sup>fl/fl</sup>* and *UBC-cre/ERT2;mir-7<sup>fl/fl</sup>* mice.

Data are presented as mean ± SD. \*P < 0.05; \*\*P < 0.01; \*\*\*P < 0.001; no asterisk indicates P > 0.05; two-tailed *t* test (a), 2-way repeated measures ANOVA (b, f, i), or 2-way repeated measures ANOVA with Sidak's multiple comparisons test (c, d, e, g, h, j, k). Source data are provided as a Source Data file.

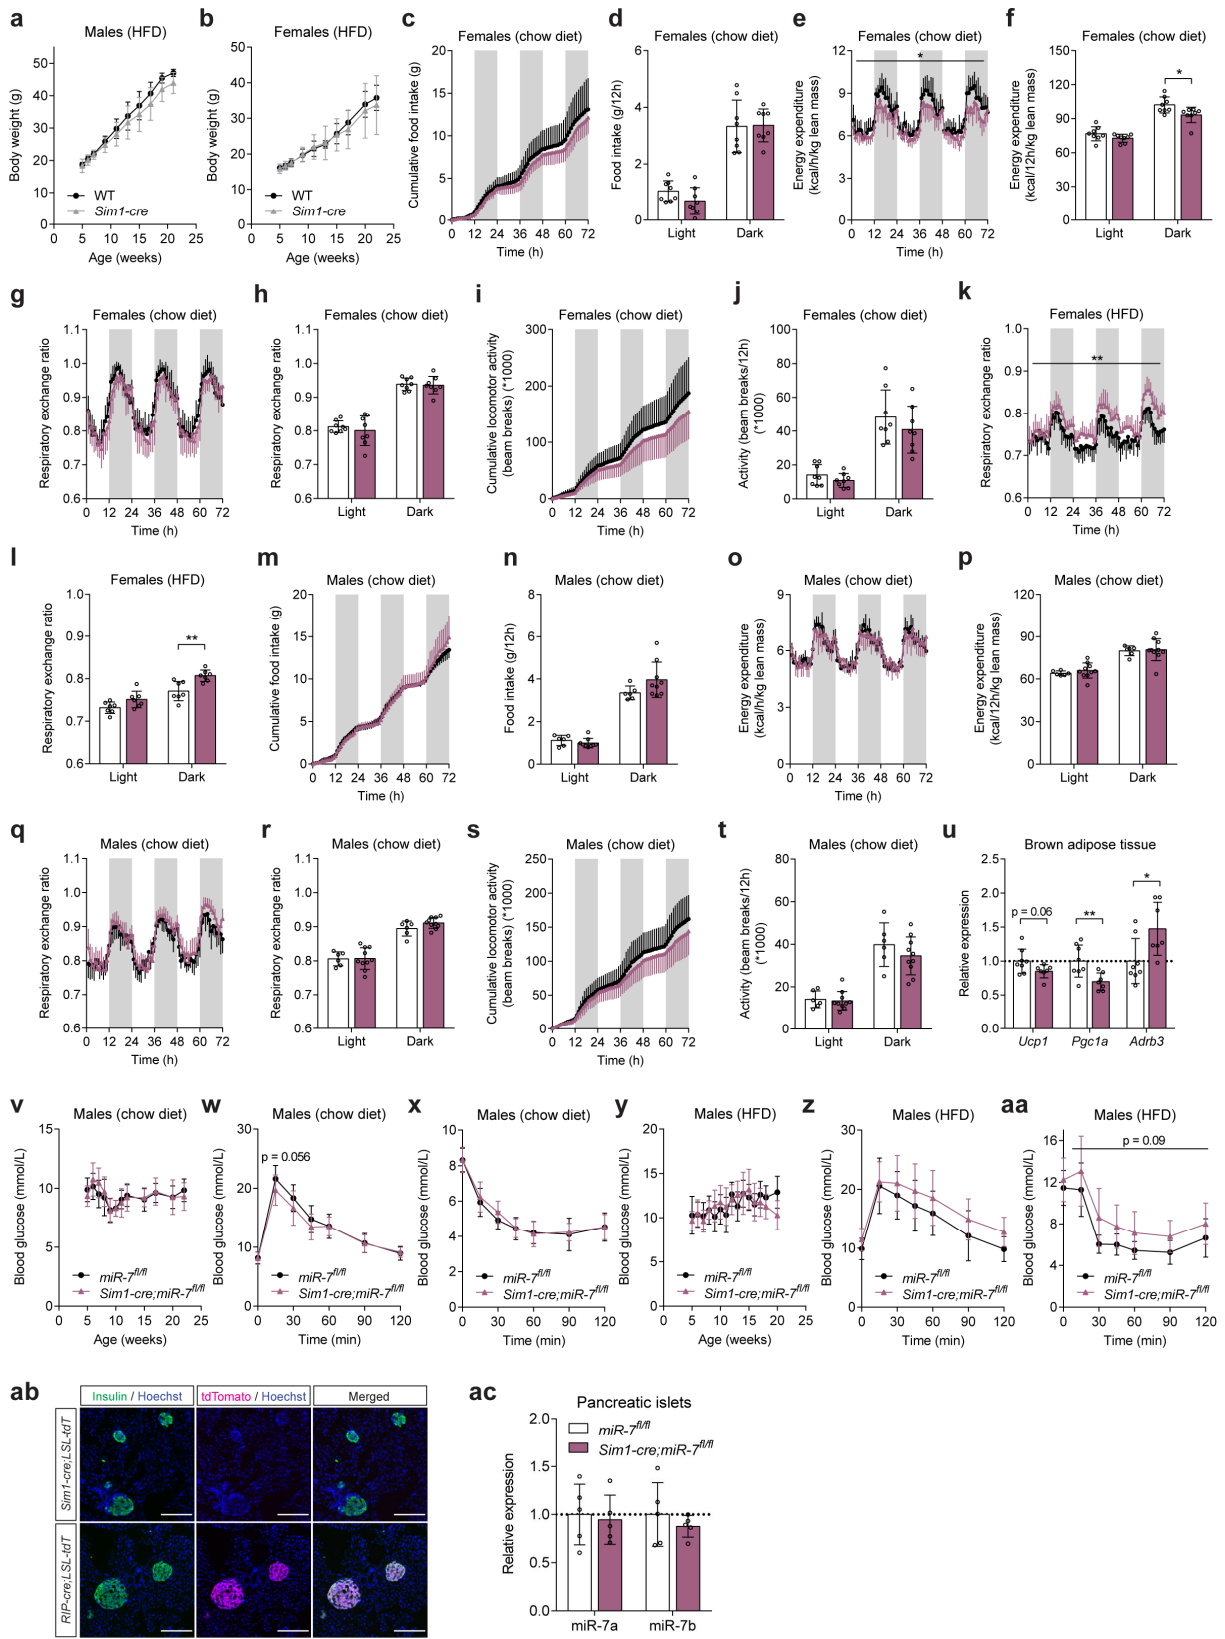

Supplementary Figure 2. Metabolic phenotypes of *Sim1-cre;mir-7<sup>fl/fl</sup>* mice. (continued on next page)

**Supplementary Figure 2. Metabolic phenotypes of *Sim1-cre;mir-7<sup>fl/fl</sup>* mice (continued).**

**(a–b)** Body weight curves of HFD-fed male (n = 5 and 6 animals) (a) and HFD-fed female (n = 7 and 6 animals) (b) wild-type and *Sim1-cre* mice.

**(c–t)** 72-hour metabolic cage measurements of chow-fed female (n = 8 animals) (c–j), HFD-fed female (n = 7 animals) (k–l), and chow-fed male (n = 6 and 10 animals) (m–t) *mir-7<sup>fl/fl</sup>* and *Sim1-cre;mir-7<sup>fl/fl</sup>* mice. (c, m) cumulative food intake; (d, n) average food intake per 12-hour phase; (e, o) hourly energy expenditure; (f, p) average energy expenditure per 12-hour phase; (g, k, q) hourly RER; (h, l, r) average RER per 12-hour phase; (i, s) cumulative locomotor activity; (j, t) average locomotor activity per 12-hour phase. Dark phases are shaded in grey.

**(u)** *Ucp1*, *Pgc1a*, and *Adrb3* expression (relative to *mir-7<sup>fl/fl</sup>*) in iBAT of *mir-7<sup>fl/fl</sup>* and *Sim1-cre;mir-7<sup>fl/fl</sup>* mice (n = 8 and 7 animals).

**(v–x)** Random fed blood glucose levels (n = 15 and 13 animals) (v), blood glucose levels during an ipGTT (n = 15 and 13 animals) (w), and blood glucose levels during an ipITT (n = 15 and 12 animals) (x) in chow-fed male *mir-7<sup>fl/fl</sup>* and *Sim1-cre;mir-7<sup>fl/fl</sup>* mice.

**(y–aa)** Random fed blood glucose levels (n = 10 and 19 animals) (y), blood glucose levels during an ipGTT (n = 6 and 13 animals) (z), and blood glucose levels during an ipITT (n = 6 and 13 animals) (aa) in HFD-fed male *mir-7<sup>fl/fl</sup>* and *Sim1-cre;mir-7<sup>fl/fl</sup>* mice.

**(ab)** Immunofluorescence of insulin and tdTomato in the pancreatic islets of *Sim1-cre;LSL-tdTomato* mice (representative of 3 mice), with *RIP-cre;LSL-tdTomato* (representative of 1 mouse) as a positive control (scale bar: 150  $\mu$ m). Green, insulin; magenta, tdTomato; blue, Hoechst.

**(ac)** miR-7a and miR-7b expression (relative to *mir-7<sup>fl/fl</sup>*) in pancreatic islets of *mir-7<sup>fl/fl</sup>* and *Sim1-cre;mir-7<sup>fl/fl</sup>* mice (n = 5 animals).

Data are presented as mean  $\pm$  SD. \*P < 0.05; \*\*P < 0.01; no asterisk indicates P > 0.05; 2-way repeated measures ANOVA with Sidak's multiple comparisons test (a, b, d, f, h, j, l, n, p, r, t, w, x, z, aa), 2-way repeated measures ANOVA (c, e, g, i, k, m, o, q, s, v, y), or two-tailed *t* test (u, ac). Source data are provided as a Source Data file.

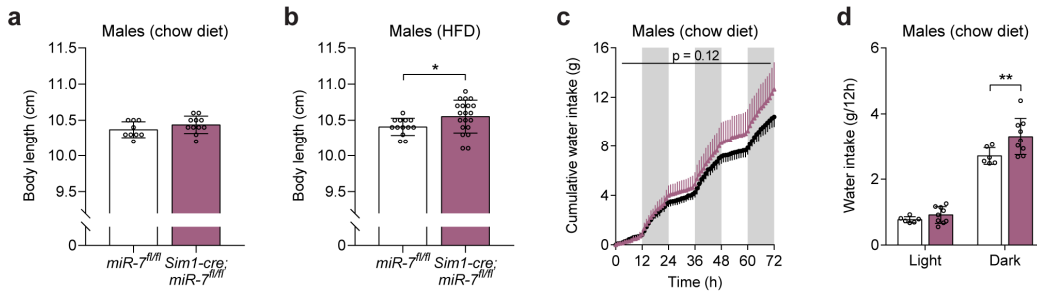

### Supplementary Figure 3. Neuroendocrine phenotypes of *Sim1-cre;mir-7<sup>fl/fl</sup>* mice.

(a–b) Body length of chow-fed male (n = 9 and 11 animals) (a) and HFD-fed male (n = 13 and 20 animals) (b) *mir-7<sup>fl/fl</sup>* and *Sim1-cre;mir-7<sup>fl/fl</sup>* mice.

(c–d) 72-hour metabolic cage measurements of chow-fed male *mir-7<sup>fl/fl</sup>* and *Sim1-cre;mir-7<sup>fl/fl</sup>* mice (n = 6 and 9 animals). (c) cumulative water intake; (d) average water intake per 12-hour phase. Dark phases are shaded in grey.

Data are presented as mean ± SD. \*P < 0.05; \*\*P < 0.01; no asterisk indicates P > 0.05; two-tailed *t* test (a, b), 2-way repeated measures ANOVA (c), or 2-way repeated measures ANOVA with Sidak's multiple comparisons test (d). Source data are provided as a Source Data file.

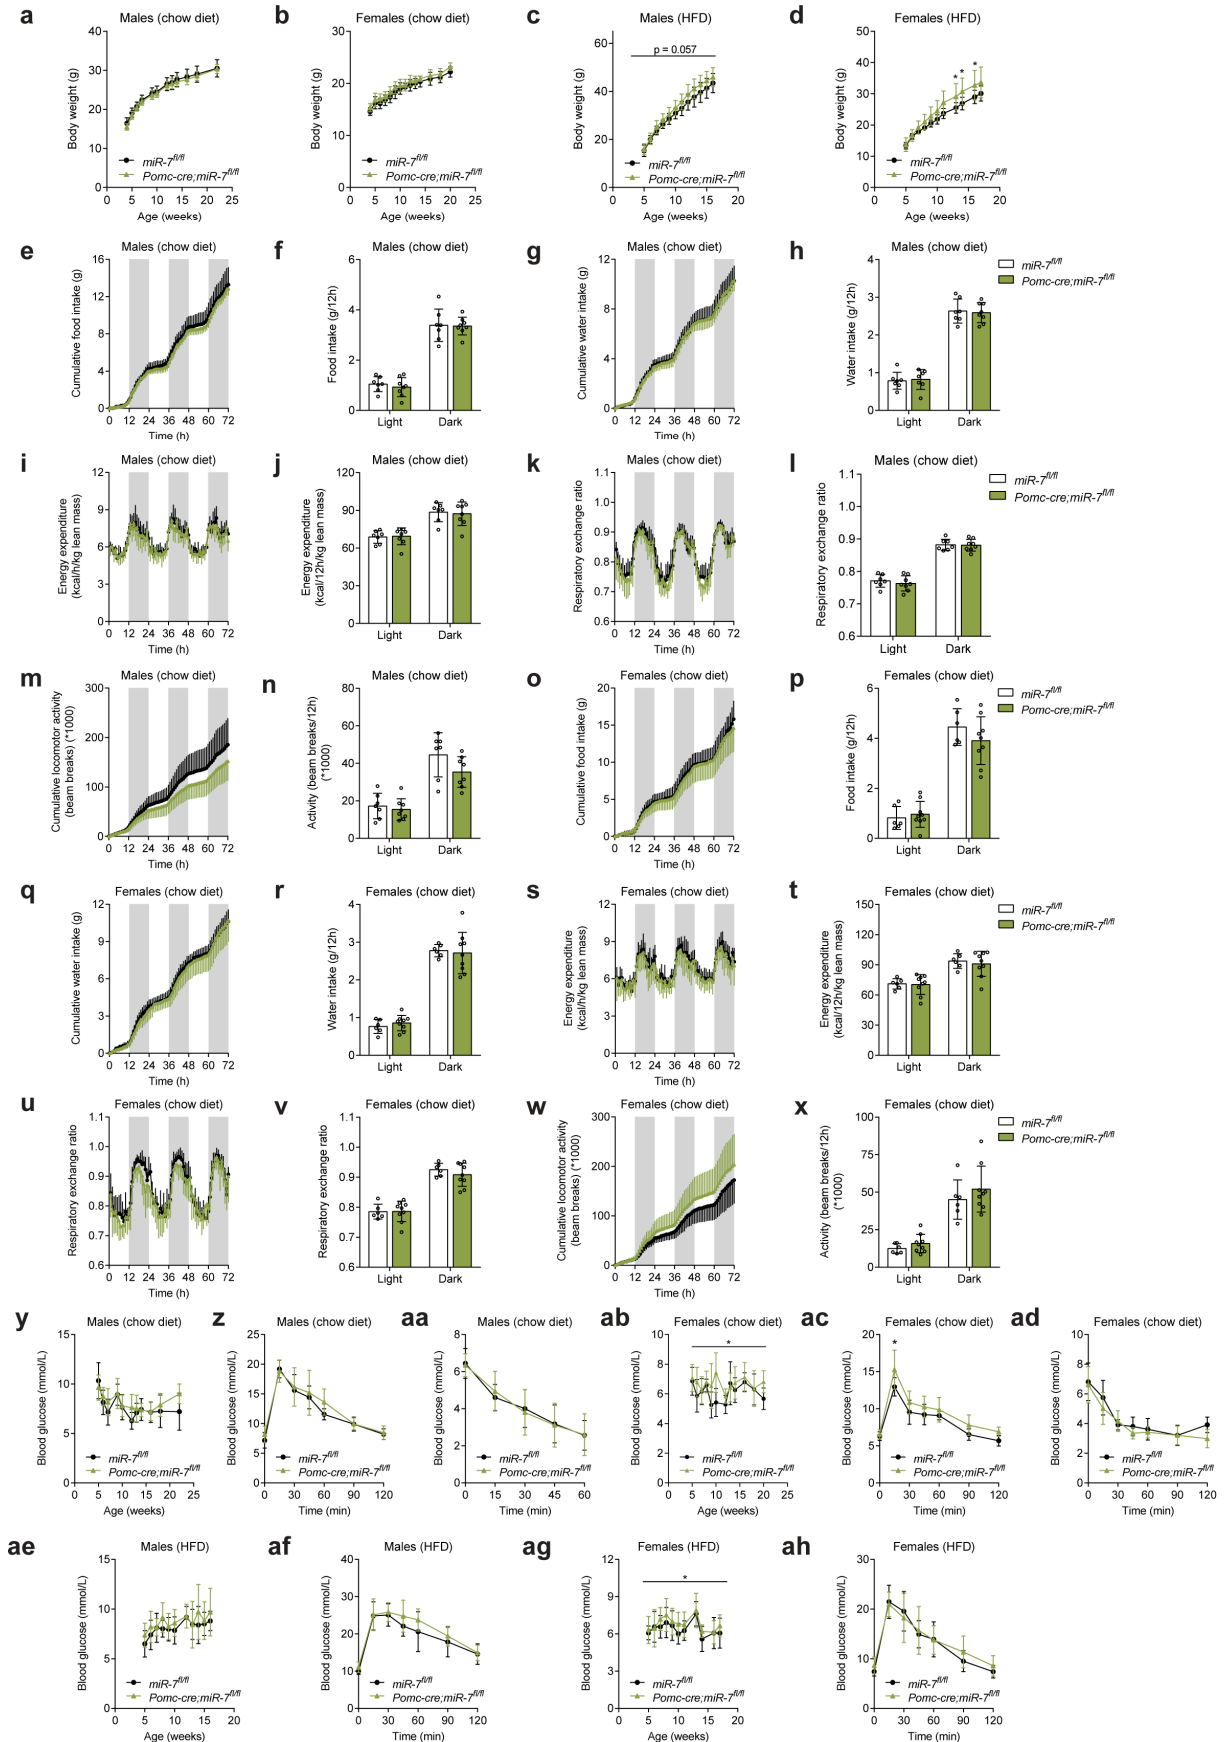

Supplementary Figure 4. Metabolic phenotypes of *Pomc-cre;mir-7<sup>fl/fl</sup>* mice. (continued on next page)

**Supplementary Figure 4. Metabolic phenotypes of *Pomc-cre;mir-7<sup>fl/fl</sup>* mice (continued).**

**(a–d)** Body weight curves of chow-fed male (n = 7 and 8 animals) (a), chow-fed female (n = 6 and 9 animals) (b), HFD-fed male (n = 14 and 13 animals) (c), and HFD-fed female (n = 9 and 15 animals) (d) *mir-7<sup>fl/fl</sup>* and *Pomc-cre;mir-7<sup>fl/fl</sup>* mice.

**(e–x)** 72-hour metabolic cage measurements of chow-fed male (n = 7 and 8 animals) (e–n) and chow-fed female (n = 6 and 9 animals) (o–x) *mir-7<sup>fl/fl</sup>* and *Pomc-cre;mir-7<sup>fl/fl</sup>* mice. (e, o) Cumulative food intake; (f, p) average food intake per 12-hour phase; (g, q) cumulative water intake; (h, r) average water intake per 12-hour phase; (i, s) hourly energy expenditure; (j, t) average energy expenditure per 12-hour phase; (k, u) hourly RER; (l, v) average RER per 12-hour phase; (m, w) cumulative locomotor activity; (n, x) average locomotor activity per 12-hour phase. Dark phases are shaded in grey.

**(y–aa)** Random fed blood glucose levels (n = 7 and 8 animals) (y), blood glucose levels during an ipGTT (n = 7 and 8 animals) (z), and blood glucose levels during an ipITT (n = 5 and 7 animals) (aa) in chow-fed male *mir-7<sup>fl/fl</sup>* and *Pomc-cre;mir-7<sup>fl/fl</sup>* mice.

**(ab–ad)** Random fed blood glucose levels (n = 6 and 9 animals) (ab), blood glucose levels during an ipGTT (n = 6 and 9 animals) (ac), and blood glucose levels during an ipITT (n = 7 and 6 animals) (ad) in chow-fed female *mir-7<sup>fl/fl</sup>* and *Pomc-cre;mir-7<sup>fl/fl</sup>* mice.

**(ae–af)** Random fed blood glucose levels (n = 14 and 13 animals) (ae) and blood glucose levels during an ipGTT (n = 7 animals) (af) in HFD-fed male *mir-7<sup>fl/fl</sup>* and *Pomc-cre;mir-7<sup>fl/fl</sup>* mice.

**(ag–ah)** Random fed blood glucose levels (n = 9 and 15 animals) (ag) and blood glucose levels during an ipGTT (n = 8 and 10 animals) (ad) in HFD-fed female *mir-7<sup>fl/fl</sup>* and *Pomc-cre;mir-7<sup>fl/fl</sup>* mice.

Data are presented as mean ± SD. \*P < 0.05; no asterisk indicates P > 0.05; 2-way repeated measures ANOVA with Sidak's multiple comparisons test (a, b, c, d, f, h, j, l, n, p, r, t, v, x, z, aa, ac, ad, af, ah), or 2-way repeated measures ANOVA (e, g, i, k, m, o, q, s, u, w, y, ab, ae, ag). Source data are provided as a Source Data file.

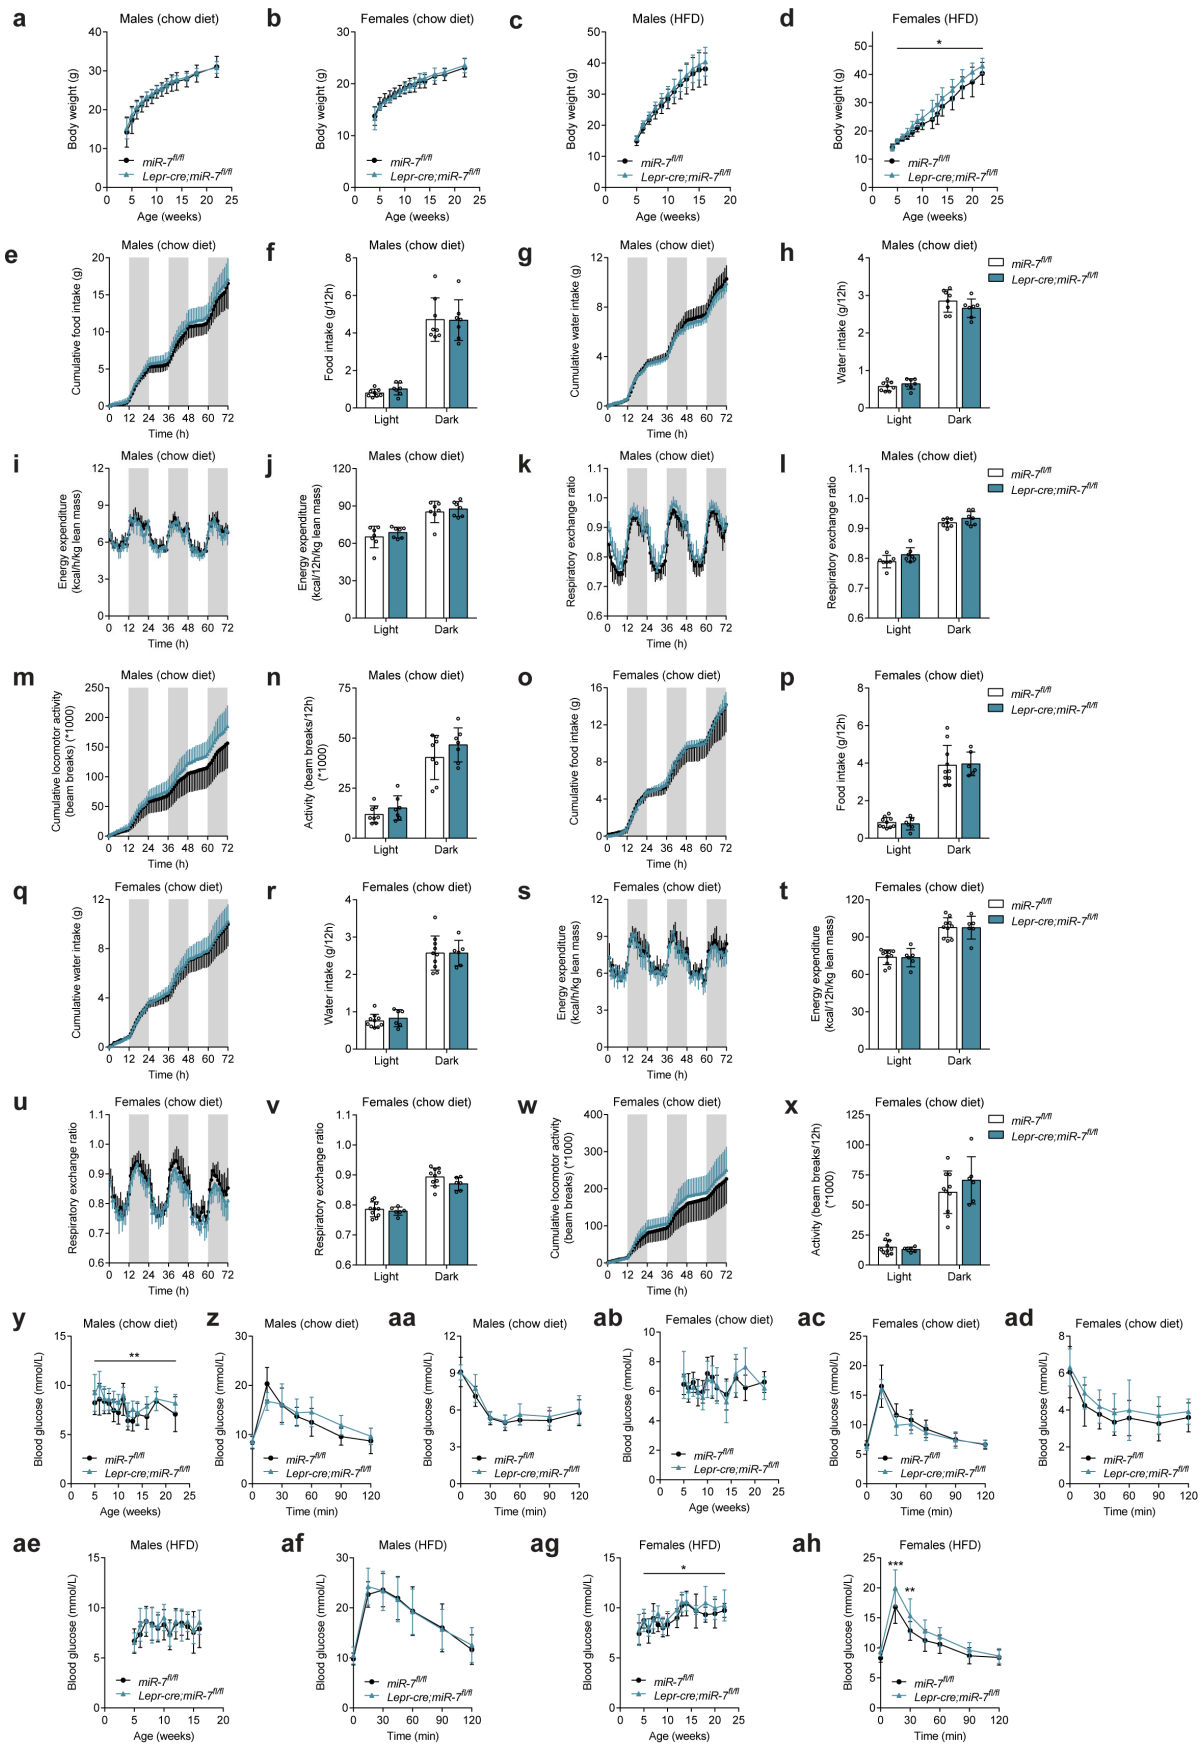

Supplementary Figure 5. Metabolic phenotypes of *Lepr-cre;mir-7<sup>b1/1</sup>* mice. (continued on next page)

**Supplementary Figure 5. Metabolic phenotypes of *Lepr-cre;mir-7<sup>fl/fl</sup>* mice (continued).**

**(a–d)** Body weight curves of chow-fed male (n = 8 and 7 animals) (a), chow-fed female (n = 13 and 6 animals) (b), HFD-fed male (n = 14 and 10 animals) (c), and HFD-fed female (n = 11 animals) (d) *mir-7<sup>fl/fl</sup>* and *Lepr-cre;mir-7<sup>fl/fl</sup>* mice.

**(e–x)** 72-hour metabolic cage measurements of chow-fed male (n = 7 and 9 animals) (e–n) and chow-fed female (n = 10 and 6 animals) (o–x) *mir-7<sup>fl/fl</sup>* and *Lepr-cre;mir-7<sup>fl/fl</sup>* mice. (e, o) Cumulative food intake; (f, p) average food intake per 12-hour phase; (g, q) cumulative water intake; (h, r) average water intake per 12-hour phase; (i, s) hourly energy expenditure; (j, t) average energy expenditure per 12-hour phase; (k, u) hourly RER; (l, v) average RER per 12-hour phase; (m, w) cumulative locomotor activity; (n, x) average locomotor activity per 12-hour phase. Dark phases are shaded in grey.

**(y–aa)** Random fed blood glucose levels (n = 8 and 7 animals) (y), blood glucose levels during an ipGTT (n = 8 and 6 animals) (z), and blood glucose levels during an ipITT (n = 10 and 9 animals) (aa) in chow-fed male *mir-7<sup>fl/fl</sup>* and *Lepr-cre;mir-7<sup>fl/fl</sup>* mice.

**(ab–ad)** Random fed blood glucose levels (n = 13 and 6 animals) (ab), blood glucose levels during an ipGTT (n = 13 and 6 animals) (ac), and blood glucose levels during an ipITT (n = 10 and 7 animals) (ad) in chow-fed female *mir-7<sup>fl/fl</sup>* and *Lepr-cre;mir-7<sup>fl/fl</sup>* mice.

**(ae–af)** Random fed blood glucose levels (n = 14 and 10 animals) (ae) and blood glucose levels during an ipGTT (n = 14 and 10 animals) (af) in HFD-fed male *mir-7<sup>fl/fl</sup>* and *Lepr-cre;mir-7<sup>fl/fl</sup>* mice.

**(ag–ah)** Random fed blood glucose levels (n = 11 animals) (ag) and blood glucose levels during an ipGTT (n = 11 animals) (ah) in HFD-fed female *mir-7<sup>fl/fl</sup>* and *Lepr-cre;mir-7<sup>fl/fl</sup>* mice.

Data are presented as mean ± SD. \*P < 0.05; \*\*P < 0.01; \*\*\*P < 0.001; no asterisk indicates P > 0.05; 2-way repeated measures ANOVA with Sidak's multiple comparisons test (a, b, c, d, f, h, j, l, n, p, r, t, v, x, z, aa, ac, ad, af, ah), or 2-way repeated measures ANOVA (e, g, i, k, m, o, q, s, u, w, y, ab, ae, ag). Source data are provided as a Source Data file.



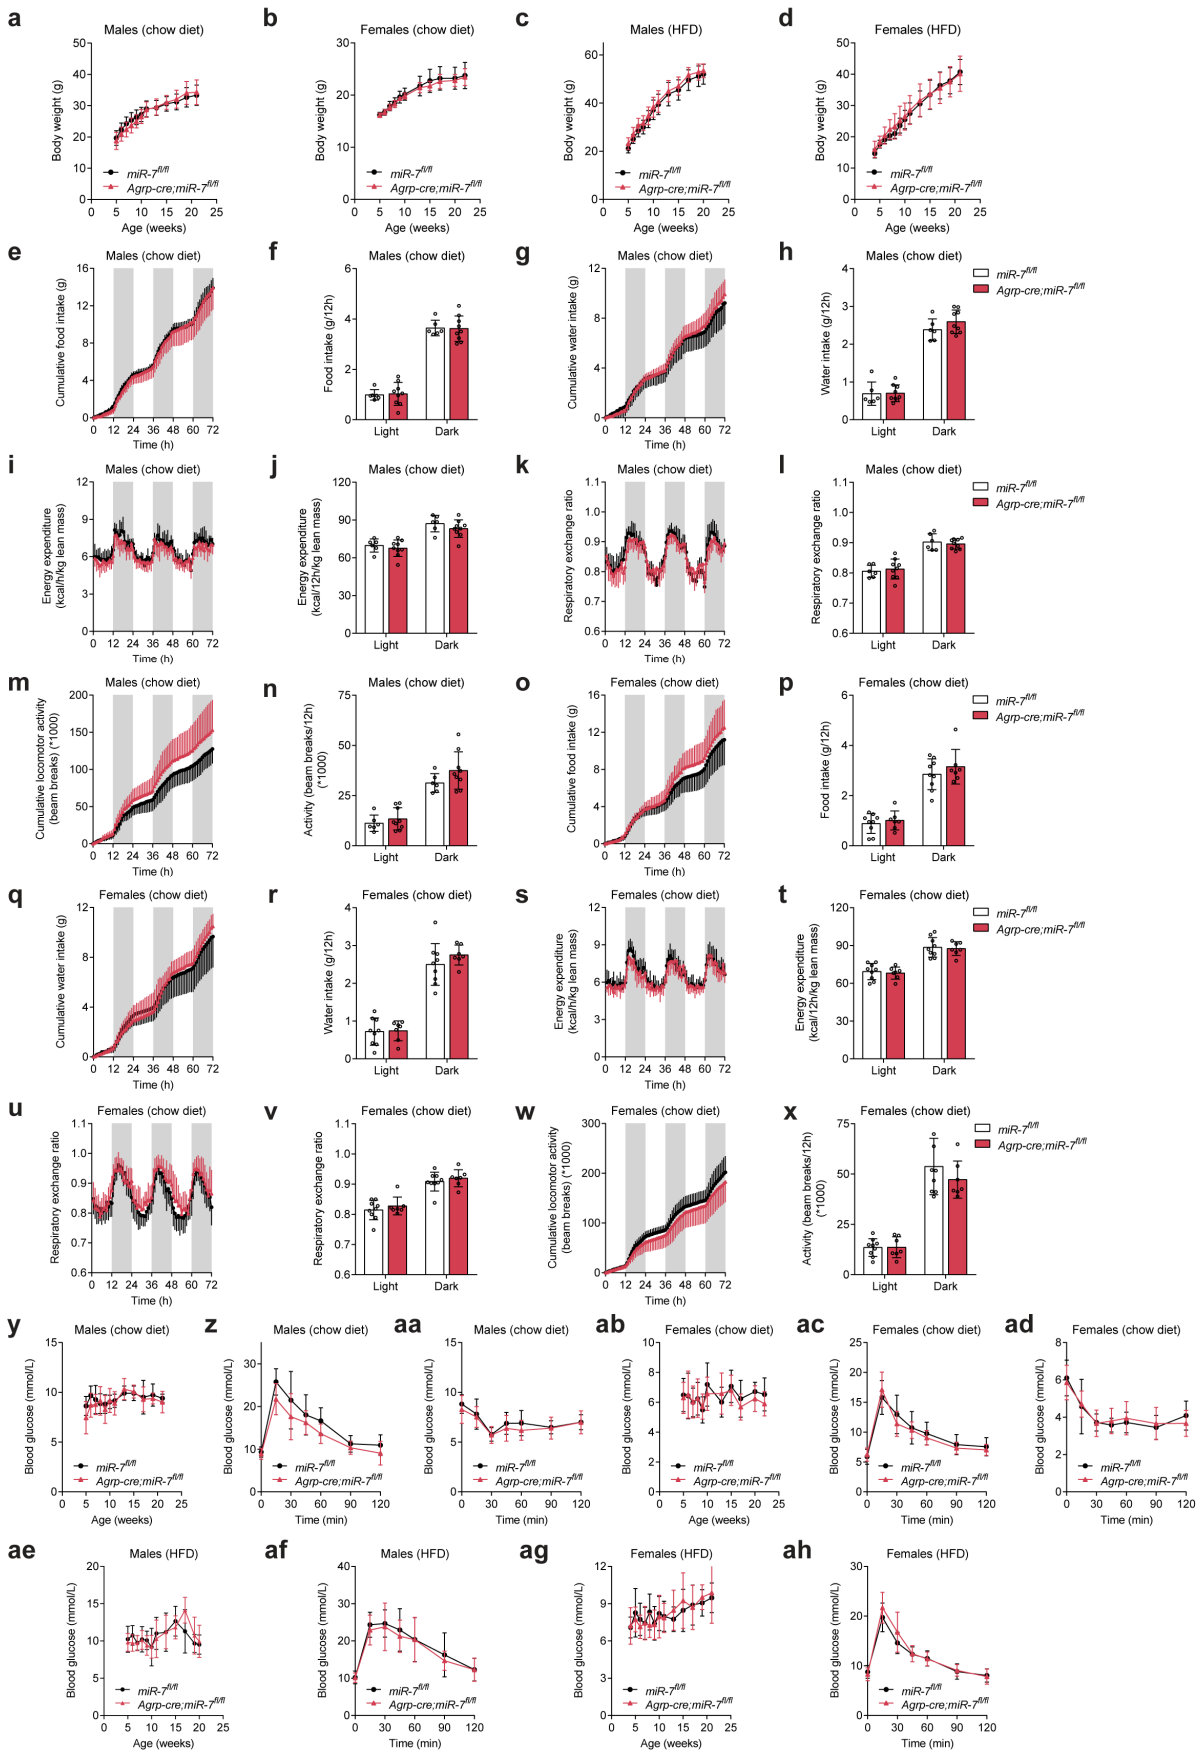

Supplementary Figure 6. Metabolic phenotypes of *Agrp-cre;mir-7<sup>fl/fl</sup>* mice. (continued on next page)

**Supplementary Figure 6. Metabolic phenotypes of *Agrp-cre;mir-7<sup>fl/fl</sup>* mice (continued).**

**(a–d)** Body weight curves of chow-fed male (n = 6 and 9 animals) (a), chow-fed female (n = 9 and 7 animals) (b), HFD-fed male (n = 11 and 6 animals) (c), and HFD-fed female (n = 16 and 7 animals) (d) *mir-7<sup>fl/fl</sup>* and *Agrp-cre;mir-7<sup>fl/fl</sup>* mice.

**(e–x)** 72-hour metabolic cage measurements of chow-fed male (n = 6 and 9 animals) (e–n) and chow-fed female (n = 9 and 7 animals) (o–x) *mir-7<sup>fl/fl</sup>* and *Agrp-cre;mir-7<sup>fl/fl</sup>* mice. (e, o) Cumulative food intake; (f, p) average food intake per 12-hour phase; (g, q) cumulative water intake; (h, r) average water intake per 12-hour phase; (i, s) hourly energy expenditure; (j, t) average energy expenditure per 12-hour phase; (k, u) hourly RER; (l, v) average RER per 12-hour phase; (m, w) cumulative locomotor activity; (n, x) average locomotor activity per 12-hour phase. Dark phases are shaded in grey.

**(y–aa)** Random fed blood glucose levels (n = 6 and 9 animals) (y), blood glucose levels during an ipGTT (n = 6 and 9 animals) (z), and blood glucose levels during an ipITT (n = 6 and 9 animals) (aa) in chow-fed male *mir-7<sup>fl/fl</sup>* and *Agrp-cre;mir-7<sup>fl/fl</sup>* mice.

**(ab–ad)** Random fed blood glucose levels (n = 9 and 7 animals) (ab), blood glucose levels during an ipGTT (n = 11 and 7 animals) (ac), and blood glucose levels during an ipITT (n = 11 and 7 animals) (ad) in chow-fed female *mir-7<sup>fl/fl</sup>* and *Agrp-cre;mir-7<sup>fl/fl</sup>* mice.

**(ae–af)** Random fed blood glucose levels (n = 11 and 6 animals) (ae) and blood glucose levels during an ipGTT (n = 11 and 6 animals) (af) in HFD-fed male *mir-7<sup>fl/fl</sup>* and *Agrp-cre;mir-7<sup>fl/fl</sup>* mice.

**(ag–ah)** Random fed blood glucose levels (n = 16 and 7 animals) (ag) and blood glucose levels during an ipGTT (n = 16 and 7 animals) (ah) in HFD-fed female *mir-7<sup>fl/fl</sup>* and *Agrp-cre;mir-7<sup>fl/fl</sup>* mice.

Data are presented as mean ± SD. No asterisk indicates P > 0.05; 2-way repeated measures ANOVA with Sidak's multiple comparisons test (a, b, c, d, f, h, j, l, n, p, r, t, v, x, z, aa, ac, ad, af, ah), or 2-way repeated measures ANOVA (e, g, i, k, m, o, q, s, u, w, y, ab, ae, ag). Source data are provided as a Source Data file.

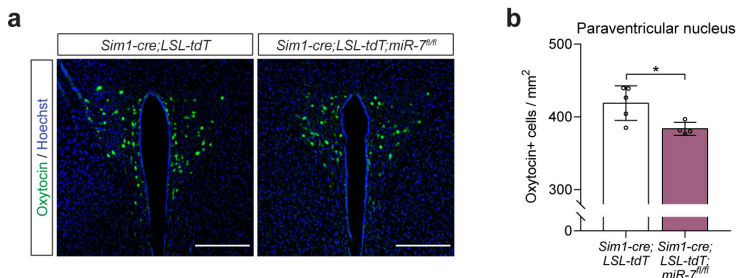**Supplementary Figure 7. Characterization of *Sim1* neuron defects.**

**(a–b)** Representative image (scale bar: 250 μm) (a) and quantification (b) of oxytocin-positive cell number within the PVN of *Sim1-cre;LSL-tdTomato* and *Sim1-cre;LSL-tdTomato;mir-7<sup>fl/fl</sup>* mice (n = 5 and 4 animals). Green, oxytocin; blue, Hoechst.

Data are presented as mean ± SD. \*P < 0.05; two-tailed *t* test (b). Source data are provided as a Source Data file.

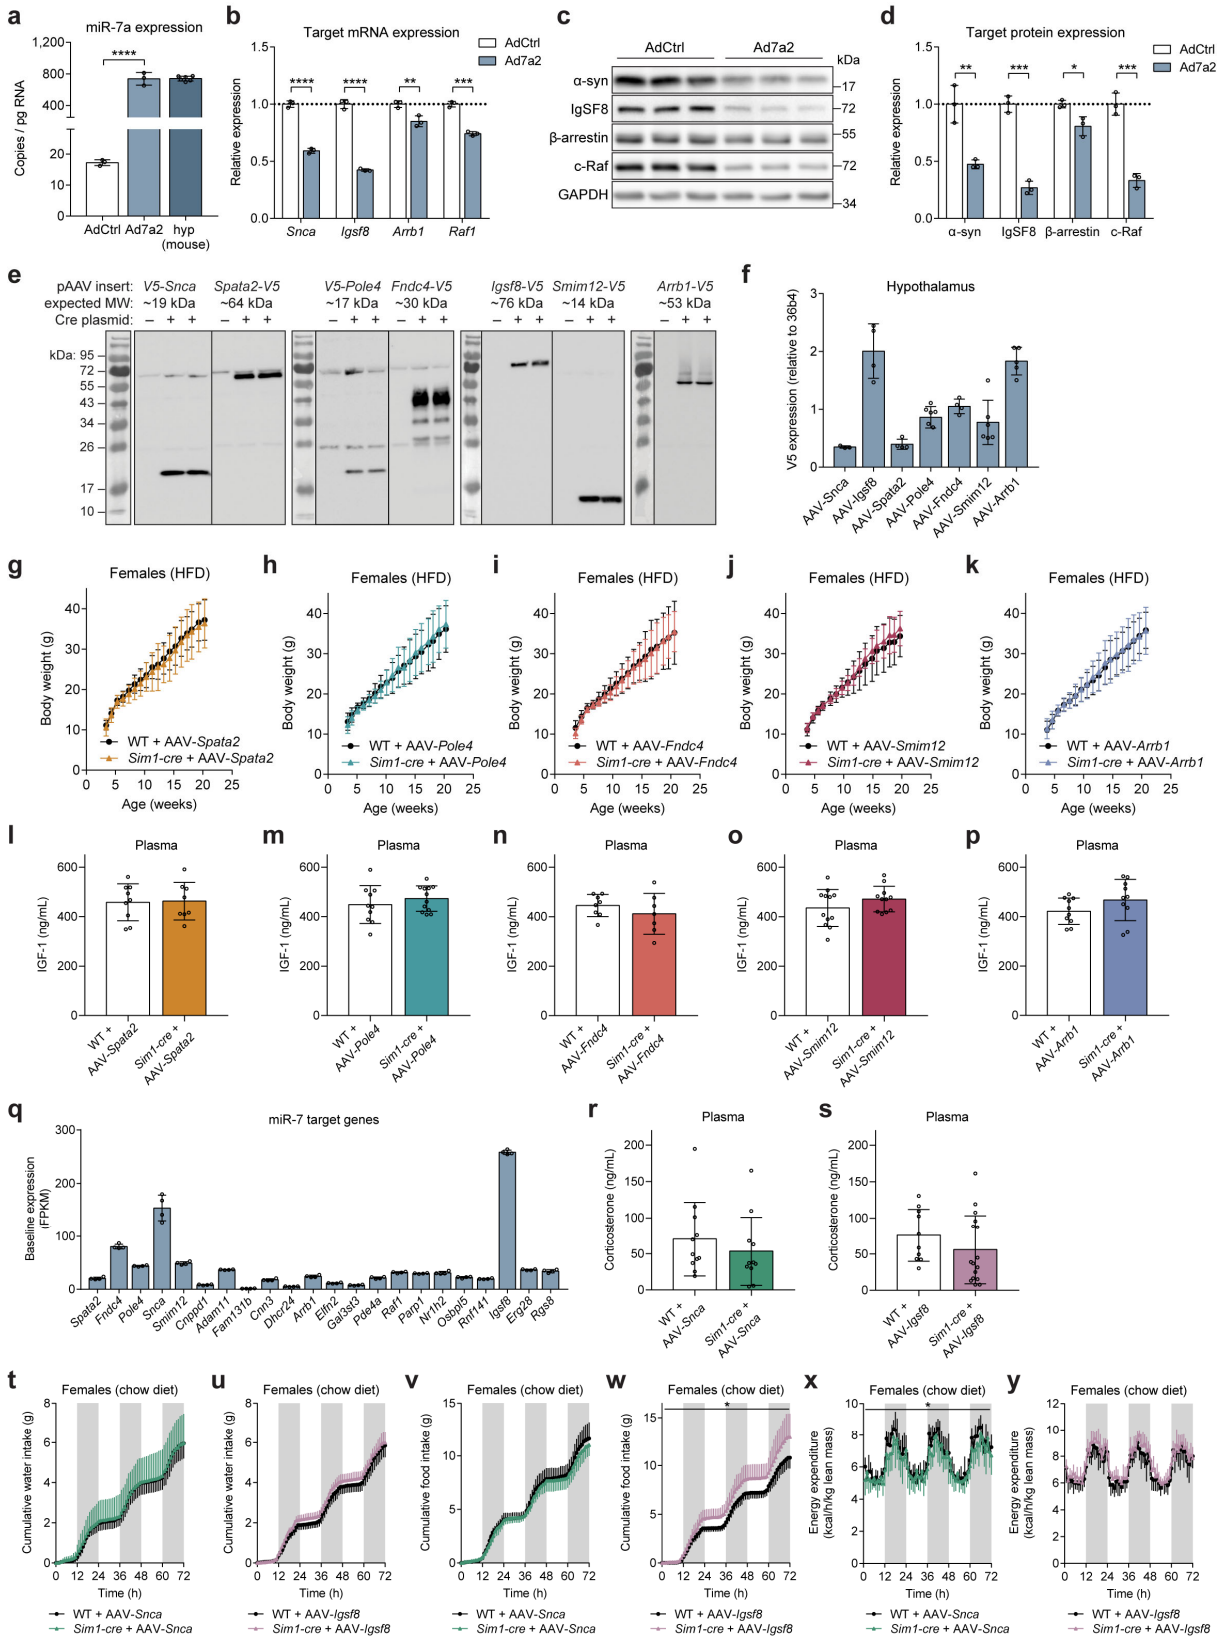

Supplementary Figure 8. Characterization of target regulation by miR-7 and AAV-mediated target gene overexpression. (continued on next page)

**Supplementary Figure 8. Characterization of target regulation by miR-7 and AAV-mediated target gene overexpression (continued).**

**(a–d)** Analyses of SH-SY5Y cells transfected with AdCtrl or Ad7a2 (n = 3; representative of two independent experiments). (a) miR-7a expression in SH-SY5Y cells compared to mouse hypothalamus; (b) mRNA expression of miR-7 targets; (c) Western blot of miR-7 targets; (d) quantification of Western blot shown in (c).

**(e)** Western blot of V5 in cells transfected with pAAV-FLEx-target gene plasmids, with or without co-expression of a plasmid encoding Cre recombinase. Each lane represents one well of transfected cells, obtained from one independent experiment. Expected molecular weight (MW) was determined by the amino acid sequence.

**(f)** V5 expression (relative to 36b4) in the hypothalamus of *Sim1-cre* mice, 4 months after injection of AAV-*Snca* (n = 3 animals), AAV-*Igsf8* (n = 4 animals), AAV-*Spata2* (n = 4 animals), AAV-*Pole4* (n = 7 animals), AAV-*Fndc4* (n = 4 animals), AAV-*Smim12* (n = 6 animals), or AAV-*Arrb1* (n = 5 animals).

**(g–k)** Body weight curves of HFD-fed female WT and *Sim1-cre* mice injected with AAV-*Spata2* (n = 9 and 8 animals) (g), AAV-*Pole4* (n = 10 and 12 animals) (h), AAV-*Fndc4* (n = 8 and 7 animals) (i), AAV-*Smim12* (n = 12 and 11 animals) (j), or AAV-*Arrb1* (n = 10 animals) (k).

**(l–p)** Plasma IGF-1 levels in female WT and *Sim1-cre* mice injected with AAV-*Spata2* (n = 9 and 8 animals) (l), AAV-*Pole4* (n = 10 and 12 animals) (m), AAV-*Fndc4* (n = 8 and 7 animals) (n), AAV-*Smim12* (n = 12 and 11 animals) (o), or AAV-*Arrb1* (n = 10 animals) (p).

**(q)** Baseline expression (*i.e.* expression in *mir-7<sup>fl/fl</sup>* mice) of the 22 upregulated miR-7 target genes identified in Fig. 5c,d (n = 4 samples, with 4 mice pooled per sample). FPKM, Fragments Per Kilobase of transcript per Million.

**(r–s)** Plasma corticosterone levels in WT and *Sim1-cre* mice injected with AAV-*Snca* (n = 11 animals) (r) or AAV-*Igsf8* (n = 10 and 16 animals) (s).

**(t–y)** 72-hour metabolic cage measurements of WT and *Sim1-cre* mice injected with AAV-*Snca* (n = 8 animals) (t, v, x) or AAV-*Igsf8* (n = 8 animals) (u, w, y). (t, u) cumulative water intake; (v, w) cumulative food intake; (x, y) hourly energy expenditure. Dark phases are shaded in grey.

Data are presented as mean ± SD. \*P < 0.05; \*\*P < 0.01; \*\*\*P < 0.001; \*\*\*\*P < 0.0001; no asterisk indicates P > 0.05; 1-way ANOVA with Tukey's multiple comparisons test (a), two-tailed *t* test (b, d, l, m, n, o, p, r, s), or 2-way repeated measures ANOVA (g–k, t–y; genotype-by-time interaction in v, w). Source data are provided as a Source Data file.

## SUPPLEMENTARY TABLES

Supplementary Table 1. Primers used for qPCR

| Species | Gene          | Forward primer                 | Reverse primer         |
|---------|---------------|--------------------------------|------------------------|
| Mouse   | <i>36b4</i>   | GCCGTGATGCCAGGGAAGACA          | CATCTGCTTGGAGCCCACGTTG |
| Mouse   | <i>Adrb3</i>  | CCTTCAACCCGGTCATCTAC           | GAAGATGGGGATCAAGCAAGC  |
| Mouse   | <i>Cdr1as</i> | CATTCAGGTTTTCTGGTGTCTGC        | GACCTGGAGATGTTGGAAGACC |
| Mouse   | <i>Cyrano</i> | TAGCATGTGAGACTGGGTTGG          | AGGGTCCACCACATCACCTT   |
| Mouse   | <i>Gh</i>     | GCTTGGCAATGGCTACAGA            | GGAAAAGCACTAGCCTCCTG   |
| Mouse   | <i>Pgcl1a</i> | GAAAGGGCCAAACAGAGAGA           | GTAAATCACACGGCGCTCTT   |
| Mouse   | <i>Pomc</i>   | CCATAGATGTGTGGAGCTGGT          | AGCGAGAGGTCGAGTTTGC    |
| Mouse   | <i>Ucp1</i>   | CGACTCAGTCCAAGAGTACTTCT<br>CTT | GCCGGCTGAGATCTTGTTTC   |
| Human   | <i>Snc1a</i>  | TCGACGACAGTGTGGTGTA            | TCCCTCCTTGGTTTTGGAGC   |
| Human   | <i>Igsf8</i>  | GCTTCCTGCCCTCAACCTG            | GGGCCAGCATCCCATTC      |
| Human   | <i>Arrb1</i>  | CAAAGGGACCCGAGTGTTCA           | GCAGGTCAGCGTCACATAGA   |
| Human   | <i>Raf1</i>   | AAAGCACTCAAGGTGAGGGG           | AGCTTCAGGAACGTCTTCCG   |
| Human   | <i>Rplp0</i>  | CGTCCTCGTGGAAGTGACAT           | ATCTGCTTGGAGCCCACATT   |
|         | <i>V5 tag</i> | GGTAAGCCTATCCCTAAC             | CGTAGAATCGAGACCGAG     |

Supplementary Table 2. Sequences of synthesized *Igsf8* 3'UTR fragments

|                        |                                                                                                                                                                                         |
|------------------------|-----------------------------------------------------------------------------------------------------------------------------------------------------------------------------------------|
| <i>Igsf8</i> 3'UTR-WT  | GAGCTCTCTGTAGCACCCAGTTCTTGCAGGTGTTGACTGTCTT<br>CCAGCCAGTGCCACCCCTCCTCTGGTTGCCTGGATACCCTCTCC<br>CTCTGTCCAGCCCACCTTTAATTTATTTGACCAGCCATCACCTA<br>GAGTGGGAGACATGGCTCCCCTGTTCCCTCCTTCTCTAGA |
| <i>Igsf8</i> 3'UTR-Mut | GAGCTCTCTGTAGCACCCAGTTCTTGCAGGTGTTGACTGCCCT<br>TCAGCCAGTGCCACCCCTCCTCTGGTTGCCTGGATACCCTCTCC<br>CTCTGTCCAGCCCACCTTTAATTTATTTGACCAGCCATCACCTA<br>GAGTGGGAGACATGGCTCCCCTGTTCCCTCCTTCTCTAGA |

**Supplementary Table 3. Oligos and primers used for generation of pAAV-FLEx-target gene vectors**

|                                 |                                                                                     |
|---------------------------------|-------------------------------------------------------------------------------------|
| N-V5-MCS_fw<br>annealing oligo  | CGCCACCATGGGTAAGCCTATCCCTAACCTCTCCTCGGTCTC<br>GATTCTACGACTAGTACGCGTATGCATC          |
| N-V5-MCS_rev<br>annealing oligo | TCGAGATGCATACGCGTACTAGTCGTAGAATCGAGACCGAGG<br>AGAGGGTTAGGGATAGGCTTACCCATGGTGGCGGTAC |
| C-V5-MCS_fw<br>annealing oligo  | CACTAGTACGCGTATGCATGGTAAGCCTATCCCTAACCTCTC<br>CTCGGTCTCGATTCTACGTAAC                |
| C-V5-MCS_rev<br>annealing oligo | TCGAGTTACGTAGAATCGAGACCGAGGAGAGGGTTAGGGATA<br>GGCTTACCATGCATACGCGTACTAGTGGTAC       |
| Snca_N-V5_fw                    | AAAAACTAGTGGTGGTGGTGGTTCTGATGTGTTTCATGAAAGG                                         |
| Snca_N-V5_rev                   | CGCCGCATGCATTTAGGCTTCAGGCTCATAG                                                     |
| Igsf8_C-V5_fw                   | AAAAACTAGTCCGCCACCATGGGCGTCCCTAGCC                                                  |
| Igsf8_C-V5_rev                  | CGCCGCATGCATAGAACCACCACCACCCCGTTCCGCATCCTC                                          |
| Spata2_C-V5_fw                  | AAAAACTAGTCCGCCACCATGGATACGAAGTACAAGG                                               |
| Spata2_C-V5_ref                 | CGCCGCATGCATAGAACCACCACCACCTCTGTACACGAGCTG<br>GG                                    |
| Pole4_N-V5_fw                   | AAAAACTAGTGGTGGTGGTGGTTCTGCGGCAGCGGCGGCT                                            |
| Pole4_N-V5_rev                  | CGCCGCATGCATTTAATCCAAAGTGCCTTCTAG                                                   |
| Fndc4_C-V5_fw                   | AAAAACTAGTCCGCCACCATGCCTCTGGCCCCCTC                                                 |
| Fndc4_C-V5_rev                  | CGCCGCATGCATAGAACCACCACCACCAACATCAATGGTGTT<br>GATTGATGG                             |
| Smim12_C-V5_fw                  | AAAAACTAGTCCGCCACCATGTGGCCTGTGCTTTG                                                 |
| Smim12_C-V5_rev                 | CGCCGCATGCATAGAACCACCACCACCGTTCTTCTCTGGACG<br>GTTTC                                 |
| Arrb1_C-V5_fw                   | AAAAACTAGTCCGCCACCATGGGCGACAAAGGGAC                                                 |
| Arrb1_C-V5_rev                  | CGCCGCATGCATAGAACCACCACCACCTCTGTTGTTGAGGTG<br>CG                                    |
